# Supplementary material for: DHA-Induced Perturbation of Human Serum Metabolome. Role of the Food Matrix and Co-Administration of Oat β-glucan and Anthocyanins
Source: PubMed Central journal article supplement (PMC7019822; doi:10.3390/nu12010086), 2019-12-27
Supplement: nutrients-12-00086-s001.pdf [file nutrients-12-00086-s001.pdf]

# **DHA-induced perturbation of human serum metabolome. Role of the food matrix and co-administration of oat $\beta$ -glucan and anthocyanins**

## *Supplementary Materials*

Veronica Ghini<sup>1</sup>, Leonardo Tenori<sup>2</sup>, Francesco Capozzi<sup>3\*</sup>, Claudio Luchinat<sup>1,4,5</sup>, Achim Bub<sup>6</sup>, Corinne Malpuech-Brugere<sup>7</sup>, Caroline Orfila<sup>8</sup>, Luigi Ricciardiello<sup>9</sup>, Alessandra Bordon<sup>3</sup>

<sup>1</sup> Center of Magnetic Resonance (CERM), University of Florence, via Luigi Sacconi, 6-50019 Sesto Fiorentino (FI), Italy.

<sup>2</sup> Department of Experimental and Clinical Medicine, University of Florence, Largo Brambilla, 3-50134 Florence (FI), Italy.

<sup>3</sup> Department of Agro-Food Science and Technology, University of Bologna, Piazza Goidanich, 60, Cesena (FC), Italy;

<sup>4</sup> Department of Chemistry, University of Florence, via della Lastruccia, 3-50019 Sesto Fiorentino (FI), Italy;

<sup>5</sup> GIOTTO Biotech S.r.l., Via Madonna del Piano, 6-50019 Sesto Fiorentino (FI), Italy;

<sup>6</sup> Max Rubner-Institute, Federal Research Centre for Nutrition and Food, Haid-und-NeuStrasse 9, DE-76131, Karlsruhe, Germany.

<sup>7</sup> Université Clermont Auvergne, INRA, UNH, Unité de Nutrition Humaine, CRNH Auvergne, F63000 Clermont-Ferrand, France.

<sup>8</sup> School of Food Science and Nutrition, University of Leeds, Woodhouse Ln, Leeds LS2 9JT, UK.

<sup>9</sup> Department of Medical and Surgical Sciences, University of Bologna, via Massarenti 9, Bologna (BO), Italy.

\* Correspondence: francesco.capozzi@unibo.it; Tel.: +39 0547 338106.

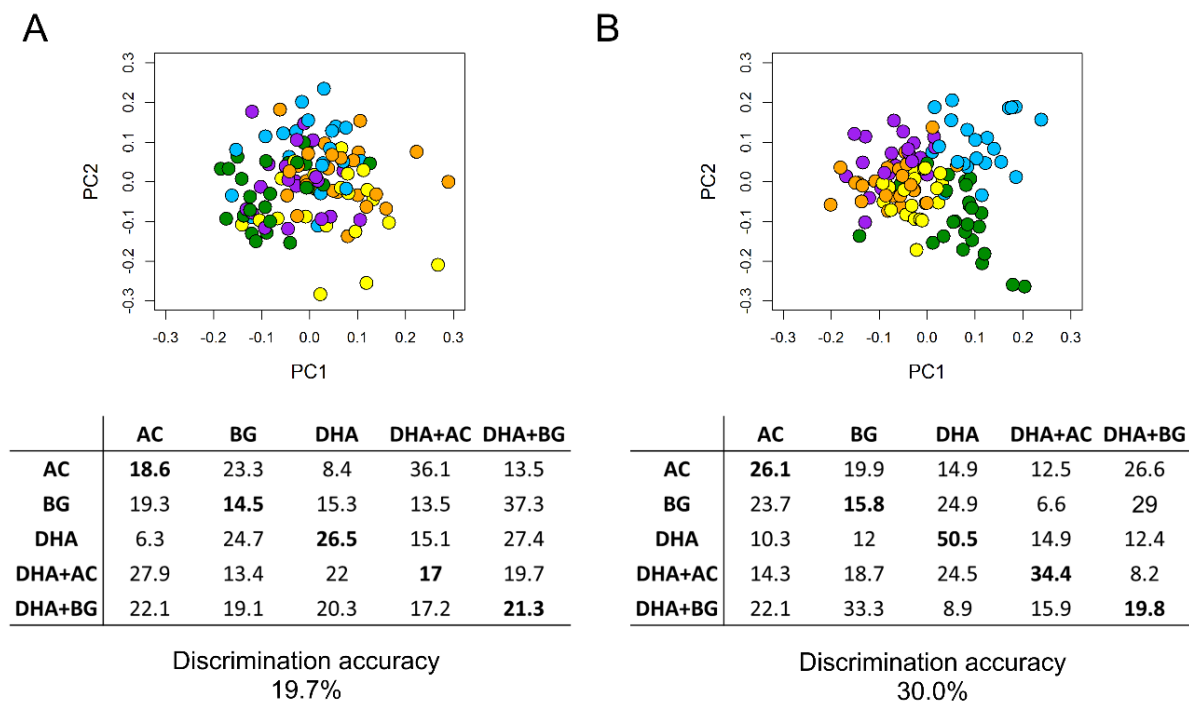

**Figure S1.** 5-Group discrimination. Score plot of PCA-CA analysis at T0 (a) and T1 (b). The values of the discrimination accuracy and the confusion matrices are also reported. In the score plot, each dot represents a different serum sample, and each colour represents a different group: dark green dots= AC; cyan dots= OBG; orange dots= DHA; yellow dots= DHA+AC; purple dots= DHA+OBG.

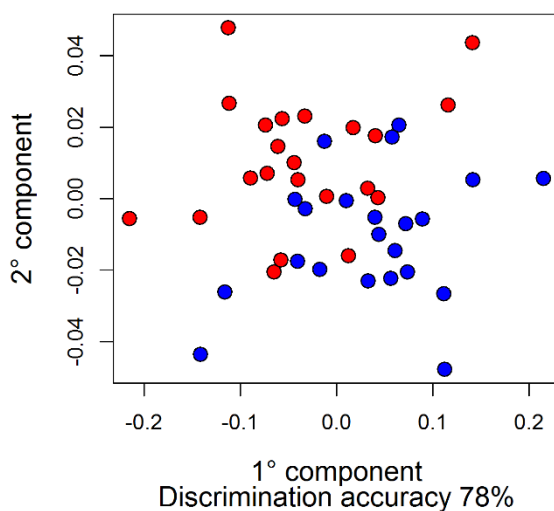

**Figure S2.** Score plot of M-PLS analysis (T0 vs. T1) of the spectral region (0.92 - 0.71 ppm) containing the signal of lipoprotein methyl group (-CH<sub>3</sub>) resonances. The value of the discrimination accuracy is also reported. In the score plots, each dot represents a different serum sample of DHA+OBG group, and each colour represents a time point: blue dots= T0 samples; red dots= T1 samples.

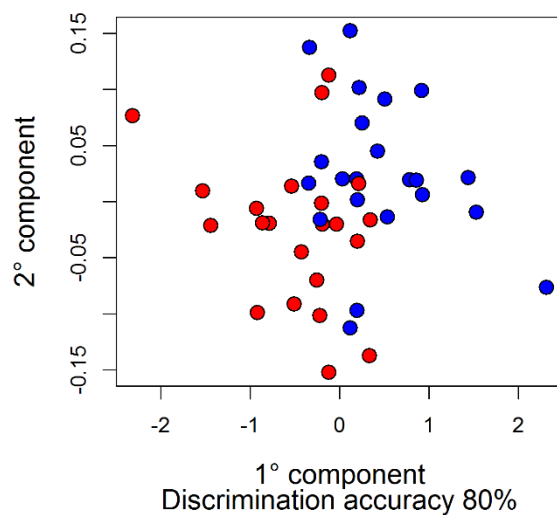

**Figure S3.** Score plot of M-PLS analysis (T0 vs. T1) of the spectral region (4.34 – 4.22 ppm) containing the signal of triglyceride resonances. The value of the discrimination accuracy is also reported. In the score plots, each dot represents a different serum sample of DHA+OBG group, and each colour represents a time point: blue dots= T0 samples; red dots= T1 samples.

**Table S1.** M-PLS discrimination accuracy values.

| <b>Enriched Biscuits</b> |      |
|--------------------------|------|
| <b>DHA</b>               | 85%  |
| AC                       | 48%  |
| OBG                      | 66%  |
| DHA+AC                   | 50%  |
| <b>DHA+OBG</b>           | 100% |

**Table S2.** Bruker IVdr Lipoprotein subclass analysis. Each significant comparison (T0 vs T1) is indicated with \* for p < 0.05 and \*\* p < 0.01.

|                                       | DHA     |          | AC      |         | OBG     |         | DHA + AC |         | DHA + OBG |         |
|---------------------------------------|---------|----------|---------|---------|---------|---------|----------|---------|-----------|---------|
|                                       | T0      | T1       | T0      | T1      | T0      | T1      | T0       | T1      | T0        | T1      |
| <b>TG</b>                             | 156.48  | 138.83   | 168.67  | 176.2   | 166.39  | 166.96  | 160.29   | 162.52  | 193.56    | 153.63* |
| <b>Chol</b>                           | 226.25  | 240.43*  | 228.49  | 218.60  | 239.18  | 241.74  | 237.95   | 230.67  | 252.82    | 250.90  |
| <b>LDL-Chol</b>                       | 122.91  | 129.37   | 123.37  | 114.94  | 131.35  | 129.25  | 133.44   | 134.43  | 136.43    | 147.09* |
| <b>HDL-Chol</b>                       | 52.04   | 53.515   | 48.89   | 49.17   | 49.77   | 51.13   | 49.47    | 47.85   | 50.41     | 51.50   |
| <b>Apo A1</b>                         | 147.1   | 148.06   | 147.03  | 143.32  | 147.58  | 149.97  | 140.9    | 137.12  | 146.04    | 142.07  |
| <b>Apo A2</b>                         | 32.71   | 32.84    | 32.66   | 33.52   | 35.77   | 34.15   | 32.36    | 30.83   | 35.42     | 34.98*  |
| <b>Apo B100</b>                       | 100.41  | 108.63*  | 100.49  | 104.33  | 105.43  | 115.31  | 111.06   | 106.76  | 114.74    | 113.23  |
| <b>Calculated Figures</b>             |         |          |         |         |         |         |          |         |           |         |
| <b>LDL-Chol/HDL-Chol</b>              | 2.40    | 2.52     | 2.35    | 2.325   | 2.66    | 2.58    | 2.64     | 2.6     | 2.745     | 2.53    |
| <b>Apo B100/ Apo A1</b>               | 1.42    | 1.26*    | 1.43    | 1.33    | 1.43    | 1.50    | 1.26     | 1.30    | 1.27      | 1.29    |
| <b>Total Apo B100 Particle Number</b> | 1825.71 | 1975.17* | 1827.19 | 1896.97 | 1916.98 | 2096.64 | 2019.42  | 1941.34 | 2086.31   | 2058.91 |
| <b>VLDL Particle Number</b>           | 192.87  | 175.21   | 226.40  | 229.415 | 203.68  | 210.67  | 210.08   | 198.28  | 236.63    | 208.71* |
| <b>IDL Particle Number</b>            | 114.72  | 125.52   | 111.30  | 110.66  | 112.87  | 121.54  | 133.99   | 120.06  | 140.01    | 113.54  |
| <b>LDL Particle Number</b>            | 1496.1  | 1589.47* | 1498.29 | 1485.65 | 1574.71 | 1641.95 | 1660.61  | 1576.62 | 1703.64   | 1726.34 |
| <b>LDL 1 Particle Number</b>          | 232.84  | 261.34   | 197.92  | 192.17  | 229.24  | 224.15  | 222.97   | 211.18  | 236.15    | 234.76  |
| <b>LDL 2 Particle Number</b>          | 135.96  | 146.20   | 127.89  | 107.465 | 144.12  | 144.61  | 156.2    | 149.43  | 128.89    | 136.96  |
| <b>LDL 3 Particle Number</b>          | 168.93  | 175.43   | 150.52  | 112.33  | 172.15  | 154.01  | 186.58   | 188.54  | 162.15    | 168.93  |
| <b>LDL 4 Particle Number</b>          | 236.97  | 250.86   | 202.88  | 177.61  | 233.12  | 219.68  | 263.76   | 259.80  | 218.57    | 257.18  |
| <b>LDL 5 Particle Number</b>          | 282.27  | 340.76   | 295.64  | 335.28  | 294.8   | 362.03  | 334.17   | 327.82  | 324.57    | 356.65  |
| <b>LDL 6 Particle Number</b>          | 417.67  | 476.1    | 478.34  | 531.35  | 458.74  | 513.02  | 486.81   | 441.21  | 538.21    | 505.63  |
| <b>Lipoprotein Main Fractions</b>     |         |          |         |         |         |         |          |         |           |         |
| <b>TG-VLDL</b>                        | 105.3   | 92.49    | 113.92  | 126.08  | 121.77  | 115.56  | 104.23   | 108.85  | 130.67    | 112.03* |
| <b>TG-IDL</b>                         | 17.61   | 14.07    | 19.86   | 19.62   | 19.45   | 19.15   | 17.51    | 16.67   | 23.67     | 16.52*  |
| <b>TG-LDL</b>                         | 22.05   | 25.26*   | 20.805  | 22.585  | 23.32   | 23.16   | 24.9     | 23.22   | 24.55     | 22.80   |
| <b>TG-HDL</b>                         | 10.69   | 10.97    | 10.85   | 11.52   | 10.46   | 9.71    | 10.84    | 10.21   | 11.69     | 10.10*  |
| <b>Chol-VLDL</b>                      | 27.59   | 22.44    | 33.35   | 34.38   | 29.47   | 28.26   | 29.04    | 27.21   | 34.54     | 28.24*  |
| <b>Chol-IDL</b>                       | 15.97   | 16.93    | 16.4    | 16.78   | 16.02   | 17.52   | 18.51    | 16.27   | 19.76     | 15.57*  |
| <b>Chol-LDL</b>                       | 122.91  | 129.37   | 123.37  | 114.94  | 131.35  | 129.25  | 133.44   | 134.43  | 136.43    | 147.09* |
| <b>Chol-HDL</b>                       | 52.04   | 53.51    | 48.895  | 49.175  | 49.77   | 51.13   | 49.47    | 47.85   | 50.41     | 51.50   |
| <b>Free Chol-VLDL</b>                 | 12.65   | 11.27    | 14.71   | 14.13   | 13.13   | 13.59   | 12.56    | 12.93   | 15.23     | 12.54*  |
| <b>Free Chol-IDL</b>                  | 4.48    | 4.95     | 4.615   | 4.71    | 4.59    | 5       | 5.33     | 4.595   | 5.48      | 4.47*   |
| <b>Free Chol-LDL</b>                  | 36.23   | 36.81    | 34.575  | 32.25   | 38.09   | 34.93   | 37.02    | 37.78   | 39.24     | 41.04   |
| <b>Free Chol-HDL</b>                  | 12.46   | 13.29    | 11.69   | 10.95   | 12.15   | 11.33   | 11.68    | 11.2    | 12.66     | 11.89   |
| <b>Phospholipids-VLDL</b>             | 28.25   | 24.50    | 31.355  | 32.84   | 30.71   | 31.17   | 29.44    | 29.69   | 33.71     | 28.06*  |
| <b>Phospholipids-IDL</b>              | 8.67    | 8.925    | 9.945   | 10.335  | 10.36   | 9.51    | 10.75    | 9.01    | 12.03     | 10.23*  |
| <b>Phospholipids-LDL</b>              | 69.93   | 72.97*   | 67.985  | 64.355  | 75.3    | 72.86   | 75.47    | 73.96   | 75.48     | 81.04   |
| <b>Phospholipids-HDL</b>              | 71.10   | 73.07    | 69.76   | 68.11   | 69.69   | 74.35   | 68.24    | 66.52   | 70.88     | 70.82   |
| <b>Apo A1-HDL</b>                     | 142.37  | 144.01   | 142.035 | 141.075 | 145.98  | 145.79  | 135.37   | 130.66  | 137.75    | 138.77  |
| <b>Apo A2-HDL</b>                     | 33.53   | 33.99    | 33.575  | 34.265  | 36.38   | 35.12   | 33.05    | 31.83   | 36.26     | 35.63*  |

|                                 |       |        |        |        |       |       |        |       |       |        |
|---------------------------------|-------|--------|--------|--------|-------|-------|--------|-------|-------|--------|
| <b>Apo B-VLDL</b>               | 10.61 | 9.63   | 12.45  | 12.62  | 11.2  | 11.59 | 11.55  | 10.90 | 13.01 | 11.48* |
| <b>Apo B-IDL</b>                | 6.31  | 6.90   | 6.125  | 6.085  | 6.21  | 6.68  | 7.37   | 6.60  | 7.7   | 6.245  |
| <b>Apo B-LDL</b>                | 82.28 | 87.42* | 82.4   | 81.71  | 86.61 | 90.3  | 91.33  | 86.71 | 93.7  | 94.94  |
| <b><i>VLDL Subfractions</i></b> |       |        |        |        |       |       |        |       |       |        |
| <b>TG-VLDL 1</b>                | 49.54 | 42.19  | 53.345 | 60.545 | 54.47 | 50.86 | 46.315 | 46.12 | 62.56 | 55.9*  |
| <b>TG-VLDL 2</b>                | 19.73 | 13.31  | 19.99  | 22.74  | 19.33 | 19.7  | 19.805 | 18.32 | 23.62 | 19.14* |
| <b>TG-VLDL 3</b>                | 15.46 | 12.54  | 17.975 | 18     | 17.3  | 16.04 | 16.29  | 14.33 | 18.71 | 16.97* |
| <b>TG-VLDL 4</b>                | 10.82 | 9.63   | 12.345 | 13.975 | 11.74 | 11.53 | 12.81  | 11.53 | 13.48 | 12.31* |
| <b>TG-VLDL 5</b>                | 3.50  | 3.4    | 3.425  | 3.13   | 3.35  | 3.53  | 3.17   | 3.32  | 3.59  | 3.31*  |
| <b>Chol-VLDL 1</b>              | 9.93  | 8.89   | 10.37  | 9.765  | 10.78 | 10.22 | 9.37   | 9.86  | 11.59 | 9.13*  |
| <b>Chol-VLDL 2</b>              | 4.68  | 3.73   | 5.115  | 5.425  | 5.06  | 4.76  | 4.65   | 4.34  | 5.67  | 4.87*  |
| <b>Chol-VLDL 3</b>              | 4.45  | 4.04   | 5.215  | 6      | 5.15  | 4.62  | 5.52   | 4.67  | 6.10  | 5.62   |
| <b>Chol-VLDL 4</b>              | 6.21  | 6.9    | 7.57   | 7.26   | 6.42  | 6.68  | 7.75   | 6.52  | 8.27  | 6.48   |
| <b>Chol-VLDL 5</b>              | 1.76  | 1.59   | 1.64   | 1.69   | 1.46  | 1.88  | 1.61   | 1.64  | 1.68  | 1.62   |
| <b>Free Chol-VLDL 1</b>         | 3.51  | 3.32   | 3.73   | 3.92   | 3.54  | 3.99  | 3.71   | 3.86  | 4.11  | 3.98*  |
| <b>Free Chol-VLDL 2</b>         | 1.93  | 1.67   | 2.11   | 2.225  | 2.15  | 1.9   | 1.95   | 1.74  | 2.31  | 1.93*  |
| <b>Free Chol-VLDL 3</b>         | 2.07  | 1.69   | 2.485  | 2.64   | 2.39  | 2.17  | 2.32   | 1.91  | 2.55  | 2.42*  |
| <b>Free Chol-VLDL 4</b>         | 2.51  | 2.87   | 2.735  | 2.72   | 2.39  | 2.45  | 2.98   | 2.5   | 3.09  | 2.37   |
| <b>Free Chol-VLDL 5</b>         | 0.83  | 0.75   | 0.84   | 0.95   | 0.85  | 0.94  | 0.66   | 0.73  | 0.88  | 0.63   |
| <b>Phospholipids-VLDL 1</b>     | 8.43  | 6.92   | 8.765  | 9.88   | 9.1   | 8.7   | 8.11   | 8.44  | 10.17 | 9.39*  |
| <b>Phospholipids-VLDL 2</b>     | 4.81  | 3.71   | 5.1    | 5.515  | 5.09  | 4.88  | 5.08   | 4.65  | 5.86  | 4.905* |
| <b>Phospholipids-VLDL 3</b>     | 4.83  | 4.09   | 5.86   | 6.195  | 5.6   | 5.5   | 5.60   | 5.19  | 5.91  | 5.74*  |
| <b>Phospholipids-VLDL 4</b>     | 5.58  | 5.57   | 6.305  | 6.89   | 5.76  | 5.72  | 6.75   | 5.76  | 6.8   | 6.04   |
| <b>Phospholipids-VLDL 5</b>     | 2.30  | 2.06   | 2.16   | 2.14   | 2.04  | 2.23  | 2.13   | 2.05  | 2.305 | 1.94   |
| <b><i>LDL Subfractions</i></b>  |       |        |        |        |       |       |        |       |       |        |
| <b>TG-LDL 1</b>                 | 6.57  | 6.42   | 5.85   | 5.91   | 5.55  | 6.39  | 6.63   | 6.01  | 6.84  | 6.1*   |
| <b>TG-LDL 2</b>                 | 2.16  | 2.47   | 1.96   | 2.03   | 2.16  | 2     | 2.72   | 2.51  | 2.3   | 2.14   |
| <b>TG-LDL 3</b>                 | 2.54  | 2.735  | 2.55   | 2.53   | 2.92  | 2.85  | 3.02   | 2.96  | 2.98  | 2.95   |
| <b>TG-LDL 4</b>                 | 2.76  | 2.88*  | 2.625  | 2.665  | 2.93  | 2.81  | 3.08   | 2.99  | 3.00  | 3.03   |
| <b>TG-LDL 5</b>                 | 3.13  | 3.79*  | 3.69   | 4.105  | 3.69  | 4.21  | 4.23   | 3.97  | 3.94  | 4.01   |
| <b>TG-LDL 6</b>                 | 4.16  | 4.87   | 4.865  | 5.605  | 4.95  | 4.84  | 5.17   | 5.04  | 5.39  | 5.42   |
| <b>Chol-LDL 1</b>               | 24.47 | 27.52  | 20.345 | 19.71  | 23.52 | 22.86 | 24.48  | 21.78 | 24.05 | 24.05  |
| <b>Chol-LDL 2</b>               | 12.69 | 14.44  | 12.04  | 9.26   | 13.49 | 13.12 | 14.89  | 14.15 | 12.38 | 12.83  |
| <b>Chol-LDL 3</b>               | 15.71 | 16.03  | 13.43  | 9.46   | 15.14 | 14.22 | 17.16  | 16.4  | 13.43 | 14.5   |
| <b>Chol-LDL 4</b>               | 20.24 | 21.23  | 15.67  | 14.68  | 20.13 | 19.35 | 22.45  | 22.54 | 18.11 | 21.15  |
| <b>Chol-LDL 5</b>               | 22.34 | 25.72  | 23.79  | 25.87  | 23.5  | 27.32 | 26.53  | 25.70 | 24.98 | 27.01  |
| <b>Chol-LDL 6</b>               | 27.9  | 32.68  | 32.14  | 34.89  | 32.19 | 34.64 | 32.36  | 29.87 | 35.63 | 34.76  |
| <b>Free Chol-LDL 1</b>          | 7.87  | 8.60   | 6.64   | 6.23   | 7.44  | 7.04  | 7.60   | 6.91  | 7.845 | 7.36   |
| <b>Free Chol-LDL 2</b>          | 4.34  | 4.68   | 4.22   | 3.35   | 4.56  | 3.96  | 4.53   | 4.26  | 4.18  | 4.61   |
| <b>Free Chol-LDL 3</b>          | 5.19  | 5.18   | 4.49   | 3.63   | 5.11  | 4.52  | 5.36   | 4.95  | 5.35  | 5.16   |
| <b>Free Chol-LDL 4</b>          | 5.88  | 6.05   | 4.53   | 4.24   | 5.93  | 5.46  | 6.24   | 6.14  | 5.50  | 6.21   |
| <b>Free Chol-LDL 5</b>          | 6.08  | 6.66   | 6.22   | 6.64   | 5.99  | 7.4   | 6.99   | 6.64  | 6.63  | 7.06   |
| <b>Free Chol-LDL 6</b>          | 6.51  | 7.32   | 8.16   | 8.03   | 7.86  | 8.28  | 7.99   | 7.18  | 8.83  | 8.42   |
| <b>Phospholipids-LDL 1</b>      | 13.54 | 15.39  | 11.63  | 11.19  | 13.36 | 13.12 | 13.52  | 12.46 | 13.85 | 13.48  |
| <b>Phospholipids-LDL 2</b>      | 7.30  | 8.05   | 7.05   | 5.34   | 7.59  | 7.49  | 8.27   | 8.16  | 7.08  | 7.57   |

|                         |       |        |        |        |       |       |       |       |       |        |
|-------------------------|-------|--------|--------|--------|-------|-------|-------|-------|-------|--------|
| Phospholipids-LDL 3     | 9.01  | 8.97   | 7.88   | 6.03   | 8.6   | 8.09  | 9.43  | 9.38  | 7.78  | 8.2    |
| Phospholipids-LDL 4     | 11.45 | 12.20  | 9.09   | 8.51   | 11.03 | 10.64 | 12.2  | 12.35 | 10.08 | 11.69  |
| Phospholipids-LDL 5     | 11.90 | 13.72  | 12.84  | 13.78  | 12.58 | 14.88 | 14.33 | 13.66 | 13.23 | 14.41  |
| Phospholipids-LDL 6     | 15.04 | 16.93  | 16.89  | 18.39  | 17.63 | 18.59 | 17.31 | 16.1  | 19.04 | 18.39  |
| Apo B-LDL 1             | 12.80 | 14.37  | 10.88  | 10.57  | 12.61 | 12.33 | 12.26 | 11.61 | 12.98 | 12.91  |
| Apo B-LDL 2             | 7.48  | 8.04   | 7.03   | 5.91   | 7.93  | 7.95  | 8.59  | 8.21  | 7.09  | 7.53   |
| Apo B-LDL 3             | 9.29  | 9.65   | 8.28   | 6.17   | 9.47  | 8.47  | 10.26 | 10.37 | 8.91  | 9.29   |
| Apo B-LDL 4             | 13.03 | 13.8   | 11.15  | 9.77   | 12.82 | 12.08 | 14.51 | 14.29 | 12.02 | 14.14  |
| Apo B-LDL 5             | 15.52 | 18.74  | 16.26  | 18.44  | 16.21 | 19.91 | 18.38 | 18.03 | 17.85 | 19.61  |
| Apo B-LDL 6             | 22.97 | 26.18  | 26.31  | 29.22  | 25.23 | 28.21 | 26.77 | 24.26 | 29.6  | 27.81  |
| <b>HDL Subfractions</b> |       |        |        |        |       |       |       |       |       |        |
| TG-HDL 1                | 2.58  | 2.93   | 2.86   | 2.62   | 2.44  | 1.95  | 2.575 | 2.61  | 2.46  | 2.695  |
| TG-HDL 2                | 1.69  | 1.79   | 1.67   | 1.85   | 1.49  | 1.48  | 1.765 | 1.66  | 1.67  | 1.415* |
| TG-HDL 3                | 2.33  | 2.5    | 2.455  | 2.6    | 2.33  | 2.34  | 2.42  | 2.41  | 2.7   | 2.11*  |
| TG-HDL 4                | 4.24  | 4.105  | 4.655  | 4.56   | 4.43  | 4.45  | 4.11  | 4.13  | 4.61  | 4.01*  |
| Chol-HDL 1              | 13.02 | 13.39  | 11.66  | 12.2   | 12.16 | 11.22 | 15.5  | 12.56 | 13.99 | 14.35  |
| Chol-HDL 2              | 7.025 | 7.035  | 6.32   | 6.5    | 6.06  | 6.01  | 6.89  | 6.59  | 6.97  | 6.63   |
| Chol-HDL 3              | 9.975 | 10.31  | 9.855  | 9.015  | 10.11 | 10.07 | 9.29  | 9.04  | 9.67  | 10.20  |
| Chol-HDL 4              | 21.77 | 21.55  | 23.45  | 22.535 | 21.37 | 21.18 | 18.94 | 18.97 | 22.83 | 21.55  |
| Free Chol-HDL 1         | 3.39  | 3.24   | 3.01   | 3.025  | 3.9   | 3.2   | 3.65  | 3.37  | 3.74  | 3.79   |
| Free Chol-HDL 2         | 1.73  | 1.68   | 1.445  | 1.435  | 1.76  | 1.58  | 1.58  | 1.49  | 1.8   | 1.69*  |
| Free Chol-HDL 3         | 2.33  | 2.47   | 2.235  | 2.15   | 2.63  | 2.41  | 2.18  | 1.95  | 2.70  | 2.29*  |
| Free Chol-HDL 4         | 4.57  | 4.475  | 4.42   | 4.125  | 4.42  | 4.12  | 3.99  | 3.63  | 4.97  | 4.41*  |
| Phospholipids-HDL 1     | 14.3  | 15.81  | 13.175 | 12.78  | 14    | 12.5  | 16.92 | 14.62 | 15.17 | 15.3   |
| Phospholipids-HDL 2     | 10.64 | 10.51  | 10.16  | 10.275 | 10.88 | 11.22 | 11.42 | 10.96 | 11.32 | 10.75  |
| Phospholipids-HDL 3     | 15.59 | 15.15  | 15.72  | 14.98  | 16.84 | 17.06 | 15.06 | 14.85 | 15.94 | 16.25* |
| Phospholipids-HDL 4     | 29.9  | 29.39  | 30.865 | 30.44  | 29.54 | 29.34 | 27.36 | 26.74 | 31.34 | 29.25  |
| Apo A1-HDL 1            | 16.82 | 16.82  | 15.95  | 15.48  | 13.65 | 13.99 | 17.88 | 16.69 | 13.33 | 15.95  |
| Apo A1-HDL 2            | 16.43 | 17.87* | 16.205 | 16.635 | 18.6  | 19.18 | 17.11 | 16    | 18.35 | 17.33  |
| Apo A1-HDL 3            | 25.77 | 26.76  | 25.995 | 25.135 | 27.4  | 28.76 | 24.69 | 24.03 | 26.60 | 26.46* |
| Apo A1-HDL 4            | 81.00 | 80.94  | 86.72  | 85.84  | 84.15 | 81.3  | 75.14 | 74.75 | 83.71 | 82.01  |
| Apo A2-HDL 1            | 1.71  | 1.97   | 1.66   | 1.695  | 1.81  | 2.01  | 2.10  | 2.13  | 2.04  | 2.065  |
| Apo A2-HDL 2            | 2.98  | 3.19   | 2.955  | 3      | 3.56  | 3.61  | 3.76  | 3.5   | 3.74  | 3.57*  |
| Apo A2-HDL 3            | 6.49  | 6.68   | 6.395  | 6.47   | 7.56  | 7.09  | 6.65  | 6.59  | 7.43  | 6.95*  |
| Apo A2-HDL 4            | 22.02 | 22.15  | 23.18  | 23.08  | 22    | 21.77 | 19.59 | 20.16 | 23.46 | 23.05  |

**Table S3.** List of metabolites whose signals were assigned and integrated in the NMR spectra. DHA+OBG discrimination between T0 and T1 in all samples and only in milkshake; each significant comparison (T0 vs T1) is indicated with \* for  $p < 0.05$  and \*\*  $p < 0.01$ .

| Metabolites       | All BEF   |           | Milkshake only |           |
|-------------------|-----------|-----------|----------------|-----------|
|                   | median T0 | median T1 | median T0      | median T1 |
| valine            | 0.2802    | 0.2971    | 0.2775         | 0.3329    |
| isoleucine        | 0.0362    | 0.0395**  | 0.0405         | 0.0429    |
| leucine           | 0.1123    | 0.1254*   | 0.112          | 0.1377    |
| 3-hydroxybutyrate | 0.022     | 0.0208    | 0.0305         | 0.0222**  |
| alanine           | 0.3994    | 0.4509*   | 0.3574         | 0.4676    |
| acetate           | 0.0108    | 0.0147    | 0.0105         | 0.0136    |
| glucose           | 0.8177    | 0.8947**  | 0.8368         | 0.968*    |
| lactate           | 0.268     | 0.3168*   | 0.2501         | 0.3049    |
| phenylalanine     | 0.0396    | 0.0474    | 0.04           | 0.0508    |
| tyrosine          | 0.041     | 0.0482    | 0.0445         | 0.0545    |
| creatine          | 0.0283    | 0.0361    | 0.0303         | 0.0344    |
| creatinine        | 0.0613    | 0.063     | 0.0609         | 0.0598    |
| glycine           | 0.1441    | 0.1693**  | 0.1407         | 0.1659**  |
| glycerol          | 0.0159    | 0.0151    | 0.015          | 0.0136    |
| histidine         | 0.0349    | 0.0348    | 0.038          | 0.037     |
| formate           | 0.0025    | 0.0029*   | 0.0016         | 0.0026*   |
| pyruvate          | 0.05      | 0.0558    | 0.0495         | 0.0554*   |
| succinate         | 0.0141    | 0.0161    | 0.011          | 0.014     |
| acetoacetate      | 0.0148    | 0.0286    | 0.0148         | 0.029*    |
| dimethylamine     | 0.0086    | 0.012**   | 0.0084         | 0.013*    |
| methionine        | 0.013     | 0.0207    | 0.0087         | 0.0308*   |
| methanol          | 0.0524    | 0.0513    | 0.0478         | 0.0478    |
| glutamine         | 0.0037    | 0.0068    | 0.0037         | 0.0077    |
| lysine            | 0.0184    | 0.019     | 0.019          | 0.0192    |
| proline           | 0.0135    | 0.0158    | 0.0115         | 0.0148    |
| histidine         | 0.037     | 0.036     | 0.0376         | 0.0365    |

|                 |        |          |        |         |
|-----------------|--------|----------|--------|---------|
| citrate         | 0.0216 | 0.0289** | 0.0214 | 0.0328* |
| dimethylglycine | 0.0128 | 0.0161   | 0.0114 | 0.0168  |
